# Supplementary material
Source: publisher figshare collection journal article supplement (https://diabetesjournals.figshare.com/ndownloader/files/25040069)

## **Supplemental Material Comment to the Editor (Separate before submission)**

Supplemental figures and tables are necessary in order to provide readers with further data into the exact schedule and exposure of immunotherapies administered, and presentation of diabetes mellitus cases that may be difficult to appropriately illustrate within the character and figure limitations of the main manuscript. The addition of these tables and figures may assist clinicians in diagnosing and treating suspected new cases of immunotherapy-induced diabetes mellitus in their own practices, and provide them with a precedence in best-practice patterns for novel adverse events.

**Online-Only Supplemental Material (Separate before submission)**

**Table S1—Supplemental—Demographics and baseline clinical characteristics**

| <b>Characteristic</b>                                                              | <b>n=18</b>  |
|------------------------------------------------------------------------------------|--------------|
| Median age at DM diagnosis, years (range)                                          | 63.5 (27-78) |
| Gender, n (%)                                                                      |              |
| Female                                                                             | 8 (44)       |
| Male                                                                               | 10 (56)      |
| Median BMI, kg/m <sup>2</sup> (range)                                              | 27 (18-34)   |
| History of HTN, n (%)                                                              | 5 (28)       |
| Primary tumor histology, n (%)                                                     |              |
| Melanoma                                                                           | 5 (28)       |
| Ovarian serous carcinoma                                                           | 2 (11)       |
| Renal cell carcinoma, clear cell                                                   | 2 (11)       |
| Urothelial carcinoma                                                               | 2 (11)       |
| Breast lobular carcinoma                                                           | 1 (6)        |
| Colon adenocarcinoma                                                               | 1 (6)        |
| Endometrial adenocarcinoma                                                         | 1 (6)        |
| Esophageal adenocarcinoma                                                          | 1 (6)        |
| Follicular lymphoma                                                                | 1 (6)        |
| Lung adenocarcinoma                                                                | 1 (6)        |
| Ovarian rhabdomyosarcoma and endometrial adenocarcinoma                            | 1 (6)        |
| Clinical stage at cancer diagnosis, n (%)                                          |              |
| I                                                                                  | 3 (17)       |
| II                                                                                 | 1 (6)        |
| III                                                                                | 4 (22)       |
| IV                                                                                 | 8 (44)       |
| Unknown                                                                            | 2 (11)       |
| Treatments received for primary cancer prior to initiation of immunotherapy, n (%) |              |
| Yes                                                                                | 17 (94)      |
| Concurrent                                                                         | 1 (6)        |
| Surgery                                                                            | 16 (89)      |
| Chemotherapy                                                                       | 12 (67)      |
| Radiation therapy                                                                  | 8 (44)       |
| Clinical stage at initiation of immunotherapy, n (%)                               |              |
| III                                                                                | 1 (6)        |
| IV                                                                                 | 16 (89)      |
| Unknown                                                                            | 1 (6)        |
| History of DM prior to immunotherapy initiation, n (%)                             |              |
| No                                                                                 | 12 (67)      |
| Prediabetes                                                                        | 5 (28)       |
| T2D, diet-controlled                                                               | 1 (6)        |
| Family history of diabetes, n (%)                                                  |              |
| T1D                                                                                | 1 (6)        |
| T2D                                                                                | 7 (39)       |
| None                                                                               | 10 (56)      |

DM, diabetes mellitus; BMI, body mass index; HTN, hypertension; T1D, type 1 diabetes; T2D, type 2 diabetes.

**Table S2—Supplemental—Immune checkpoint inhibitor exposure (n=18)**

| <b>Combination Therapy</b>             | <b>No. of Patients (%)</b> |
|----------------------------------------|----------------------------|
| <b>Any combination therapy</b>         | 9 (50)                     |
| <b>CTLA-4 + PD-1</b>                   | 6 (33)                     |
| Ipilimumab + nivolumab                 | 6/6 (100)                  |
| <b>CTLA-4 + PD-L1</b>                  | 2 (11)                     |
| Durvalumab + tremelimumab              | 2/2 (100)                  |
| <b>CTLA-4 + PD-1 + PD-L1</b>           | 1 (6)                      |
| Ipilimumab + nivolumab + pembrolizumab | 1/1 (100)                  |
| <b>Monotherapy</b>                     |                            |
| <b>Any monotherapy</b>                 | 9 (50)                     |
| <b>PD-1</b>                            | 6 (33)                     |
| Nivolumab                              | 5/6 (83)                   |
| Pembrolizumab                          | 1/6 (17)                   |
| <b>PD-L1</b>                           | 3 (17)                     |
| Atezolizumab                           | 1/3 (33)                   |
| Durvalumab                             | 2/3 (67)                   |
| <b>PD-1/PD-L1 Agent</b>                |                            |
| <b>Any PD-1 or PD-L1 exposure</b>      | 18 (100)                   |
| <b>PD-1</b>                            | 12 (67)                    |
| Nivolumab                              | 11/12 (92)                 |
| Pembrolizumab                          | 1/12 (8)                   |
| <b>PD-1 + PD-L1</b>                    | 1 (6)                      |
| <b>Pembrolizumab, nivolumab</b>        | 1/1 (100)                  |
| <b>PD-L1</b>                           | 5 (28)                     |
| Atezolizumab                           | 1/5 (20)                   |
| Durvalumab                             | 4/5 (80)                   |

CTLA-4, cytotoxic T-lymphocyte-associated antigen 4; PD-1, programmed cell death protein 1; PD-L1, programmed cell death protein ligand 1.

**Table S3—Supplemental—Results pertaining to insulin-dependent diabetes mellitus presentation**

|                       | Time from first dose PD-1 to IDDM dx (mo.) | DKA* | Initial glucose* (mmol/L) | Random glucose prior to IDDM dx (mmol/L) median of 16 days before ICI-DM (range, 11-51) | Random C-peptide*† (nmol/L) | Lowest random C-peptide† on f/u (nmol/L) | Elev amylase* (y/n) | Elev lipase* (y/n) | HbA1C* (%)     | HbA1C* (mmol/mol) | GAD Ab+ (y/n) | Insulin TDD 3-6 mo. after IDDM dx (U/kg) | Response to ICI therapy |
|-----------------------|--------------------------------------------|------|---------------------------|-----------------------------------------------------------------------------------------|-----------------------------|------------------------------------------|---------------------|--------------------|----------------|-------------------|---------------|------------------------------------------|-------------------------|
| <b>Median (range)</b> | 3.65 (0.56-12.23)                          |      | 27.92 (18.59-46.9)        | 6.35 (4.38-14.49)                                                                       | 0.07 (<0.01-0.55)           | <0.01 (<0.01-0.2)                        |                     |                    | 7.25 (5.8-9.5) | 56 (40-80)        |               | 0.49 (0.2-1.03)                          |                         |
| <b>Patient</b>        |                                            |      |                           |                                                                                         |                             |                                          |                     |                    |                |                   |               |                                          |                         |
| <b>1</b>              | 3.4                                        | +    | 43.57                     | 8.16                                                                                    | 0.07                        | 0.02                                     | NR                  | NR                 | NR             | NR                | y             | 0.20                                     | SD                      |
| <b>2</b>              | 3.7                                        | -    | 28.31                     | 4.55                                                                                    | <0.07                       | <0.07                                    | y                   | y                  | 6.9            | 52                | NR            | NR                                       | POD                     |
| <b>3</b>              | 9.3                                        | -    | 25.64                     | 5                                                                                       | 0.26                        | <0.01                                    | n                   | n                  | 7.0            | 53                | n             | 0.40                                     | CR                      |
| <b>4</b>              | 3.0                                        | +    | NR                        | NR                                                                                      | <0.01                       | <0.01                                    | NR                  | NR                 | NR             | NR                | NR            | 0.39                                     | POD                     |
| <b>5</b>              | 12.2                                       | +    | 46.9                      | 6.94                                                                                    | 0.03                        | <0.01                                    | NR                  | NR                 | 8.4            | 68                | n             | 0.59                                     | CR                      |
| <b>6</b>              | 3.3                                        | -    | 18.76                     | 13.82                                                                                   | 0.17                        | <0.01                                    | n                   | n                  | 9.0            | 75                | y             | 0.34                                     | CR                      |
| <b>7</b>              | 0.6                                        | -    | 23.09                     | 6.11                                                                                    | NR                          | NR                                       | NR                  | NR                 | 6.3            | 45                | y             | NR                                       | SD                      |
| <b>8</b>              | 12.4                                       | +    | 21.53                     | 14.49                                                                                   | 0.04                        | 0.04                                     | y                   | y                  | 8.8            | 73                | NR            | 0.28                                     | POD                     |
| <b>9</b>              | 5.6                                        | -    | 18.59                     | NR                                                                                      | 0.18                        | <0.03                                    | NR                  | NR                 | 6.4            | 46                | n             | 0.48                                     | POD                     |
| <b>10</b>             | 4.2                                        | +    | 31.19                     | 6.49                                                                                    | 0.14                        | <0.01                                    | n                   | n                  | 8.3            | 67                | n             | 0.68                                     | POD                     |
| <b>11</b>             | 2.3                                        | -    | 27.92                     | 9.77                                                                                    | <0.01                       | <0.01                                    | NR                  | NR                 | NR             | NR                | NR            | 0.89                                     | POD                     |
| <b>12</b>             | 10.6                                       | +    | 44.9                      | 5.88                                                                                    | 0.05                        | <0.01                                    | n                   | y                  | 6.9            | 52                | NR            | 0.62                                     | PR                      |
| <b>13</b>             | 6.0                                        | +    | 21.7                      | 7.38                                                                                    | 0.2                         | 0.2                                      | n                   | y                  | 7.5            | 58                | n             | NR                                       | POD                     |
| <b>14</b>             | 0.8                                        | -    | 19.98                     | 5.72                                                                                    | <0.01                       | <0.01                                    | NR                  | NR                 | NR             | NR                | NR            | 0.49                                     | POD                     |
| <b>15</b>             | 1.4                                        | -    | 20.7                      | 6.22                                                                                    | 0.55                        | 0.02                                     | n                   | n                  | 7              | 53                | y             | NR                                       | POD                     |
| <b>16</b>             | 3.7                                        | +    | 46.34                     | 4.38                                                                                    | 0.11                        | 0.11                                     | y                   | n                  | 9.4            | 79                | n             | 0.73                                     | POD                     |
| <b>17</b>             | 0.8                                        | +    | 32.69                     | 5.44                                                                                    | <0.07                       | <0.07                                    | n                   | n                  | 5.8            | 40                | y             | NR                                       | NR                      |
| <b>18</b>             | 9.9                                        | -    | 30.36                     | 11.88                                                                                   | 0.29                        | 0.04                                     | NR                  | NR                 | 9.5            | 80                | n             | 1.03                                     | CR                      |

PD-1, programmed cell death protein 1; IDDM dx, insulin-dependent diabetes mellitus diagnosis; mo, months; DKA, diabetic ketoacidosis; f/u, follow-up; Elev, elevated; y, yes; n, no; GAD, glutamic acid decarboxylase; Ab+, antibody-positive; TDD, total daily dose; ICI, immune checkpoint inhibitor; +, positive; -, negative; NR, not reported; SD, stable disease; POD, progression of disease; CR, complete response; PR, partial response. \*At IDDM presentation.

†Random C-peptide reference range=0.23-0.81 nmol/L.

**Table S4—Supplemental—HLA Class I data**

| <b>Patient</b> | <b>HLA Class I Germline Alleles</b>      |
|----------------|------------------------------------------|
| <b>1</b>       | A2601, A2601, B3801, B3801, C1203, C1203 |
| <b>2</b>       | -                                        |
| <b>3</b>       | A2902, A3101, B3501, B4403, C0401, C1601 |
| <b>4</b>       | -                                        |
| <b>5</b>       | -                                        |
| <b>6</b>       | -                                        |
| <b>7</b>       | A0301, A6802, B0702, B5301, C0401, C0702 |
| <b>8</b>       | A0101, A2402, B0801, B5601, C0102, C0701 |
| <b>9</b>       | -                                        |
| <b>10</b>      | A2902, A2601, B4403, B4402, C1601, C0501 |
| <b>11</b>      | A0301, A0201, B3501, B5801, C1203, C0701 |
| <b>12</b>      | A0201, A6901, B4901, B3501, C1502, C0401 |
| <b>13</b>      | A0301, A3002, B5701, B1801, C0501, C0602 |
| <b>14</b>      | A1101, A2402, B4901, B5201, C1202, C0701 |
| <b>15</b>      | -                                        |
| <b>16</b>      | A6601, A2601, B3801, B3801, C1203, C1203 |
| <b>17</b>      | -                                        |
| <b>18</b>      | A0101, A0201, B4402, B4402, C0501, C0501 |

HLA, human leukocyte antigen; T1D, type 1 diabetes.

**Table S5—Supplemental—Pancreatic atrophy.** Volumetric pancreatic parenchymal estimates were quantified in all 18 patients by a single board-certified radiologist. “Baseline” and “last follow-up” pancreatic volumes were derived from 3-dimensional imaging available approximately 4-24 months before and 4-24 months following ICI-DM diagnosis, respectively. Volume changes around ICI-DM diagnosis, referred to as “pre-DM” and “post-DM” pancreatic volumes, were assessed by available scans 3 months pre- and post-IDDM, respectively.

| Time of Pancreas Volume Measurement | Median (Range), cm <sup>3</sup> | Wilcoxon Rank Sum Test p Value | Median Percent Change (Range) |
|-------------------------------------|---------------------------------|--------------------------------|-------------------------------|
| <b>Baseline</b>                     | 76.6 (42.3, 159.3)              | Reference                      | Reference                     |
| <b>Pre-DM</b>                       | 75.1 (37.9, 147.2)              | 0.007                          | 5.6% (-11.1%, 39.2%)          |
| <b>Post-DM</b>                      | 63.7 (34.9, 150.7)              | < .001                         | -16.1% (-59.1%, 1.0%)         |
| <b>Last follow-up</b>               | 53.9 (26.9, 109.36)             | < .001                         | -30.8% (-70.9%, 0.0%)         |

IDDM, insulin-dependent diabetes mellitus

**Table S6—Supplemental—Immune checkpoint inhibitor dosing**

| Patient | PD-1 or PD-L1 exposure    | PD-1 dose per cycle |            | PD-1 cumulative dose prior to IDDM dx | PD-1 cycles prior to IDDM dx | CTLA-4 exposure | CTLA-4 dose per cycle |         | CTLA-4 cumulative dose prior to IDDM dx | CTLA-4 4 cycles prior to IDDM dx |
|---------|---------------------------|---------------------|------------|---------------------------------------|------------------------------|-----------------|-----------------------|---------|-----------------------------------------|----------------------------------|
|         |                           | (mg)                | (mg/kg)*   | (mg)                                  |                              |                 | (mg)                  | (mg/kg) | (mg)                                    |                                  |
| 1       | pembrolizumab             | 200                 | 3.6        | 1000                                  | 5                            | -               | -                     | -       | -                                       | -                                |
| 2       | nivolumab + pembrolizumab | N: 72<br>P: 130     | N:1<br>P:2 | N: 72<br>P: 130                       | N: 1<br>P: 1                 | ipilimumab      | 215                   | 3       | 215                                     | 1                                |
| 3       | nivolumab                 | 230                 | 3          | 1410                                  | 9                            | ipilimumab      | 225                   | 3       | 900                                     | 4                                |
| 4       | nivolumab                 | NR                  | NR         | NR                                    | NR                           | ipilimumab      | NR                    | NR      | NR                                      | NR                               |
| 5       | nivolumab                 | 310                 | 3          | 6720                                  | 23                           | ipilimumab      | 330                   | 3       | 330                                     | 1                                |
| 6       | nivolumab                 | 240                 | 3          | 1680                                  | 7                            | -               | -                     | -       | -                                       | -                                |
| 7       | nivolumab                 | 90                  | 1          | 175                                   | 2                            | ipilimumab      | 270                   | 3       | 530                                     | 2                                |
| 8       | nivolumab                 | 240                 | 3          | 4467                                  | 19                           | -               | -                     | -       | -                                       | -                                |
| 9       | nivolumab                 | NR                  | NR         | NR                                    | NR                           | -               | -                     | -       | -                                       | -                                |
| 10      | nivolumab                 | 240                 | 3          | 720                                   | 3                            | -               | -                     | -       | -                                       | -                                |
| 11      | nivolumab                 | 330                 | 3          | 1650                                  | 5                            | -               | -                     | -       | -                                       | -                                |
| 12      | nivolumab                 | 229                 | 3          | 4731                                  | 21                           | ipilimumab      | 68                    | 1       | 280                                     | 4                                |
| 13      | nivolumab                 | 211                 | 3          | 2321                                  | 11                           | ipilimumab      | 70                    | 1       | 140                                     | 2                                |
| 14      | durvalumab                | NR                  | -          | NR                                    | NR                           | -               | -                     | -       | -                                       | -                                |
| 15      | durvalumab                | 750                 | -          | 2250                                  | 3                            | -               | -                     | -       | -                                       | -                                |
| 16      | durvalumab                | 1500                | -          | 3000                                  | 2                            | tremelimumab    | 75                    | -       | 150                                     | 2                                |
| 17      | durvalumab                | 1500                | -          | 1500                                  | 1                            | tremelimumab    | 75                    | -       | 75                                      | 1                                |
| 18      | atezolizumab              | 1200                | -          | 16800                                 | 14                           | -               | -                     | -       | -                                       | -                                |

PD-1, programmed cell death protein 1; PD-L1, programmed cell death protein ligand 1; IDDM dx, insulin-dependent diabetes mellitus diagnosis; CTLA-4, cytotoxic T-lymphocyte-associated antigen 4; N, nivolumab; P, pembrolizumab; NR, not reported. \*Doses are reported in mg/kg only if weight-based dosing is applicable for the specific agent.

**Table S7—Supplemental—Steroid exposure**

| <b>Patient</b> | <b>Steroids prior to<br/>IDDM dx</b> | <b>Time from last<br/>steroid dose to IDDM<br/>dx (days)</b> |
|----------------|--------------------------------------|--------------------------------------------------------------|
| <b>1</b>       | dexamethasone                        | 133                                                          |
| <b>8</b>       | prednisone                           | 71                                                           |
| <b>10*</b>     | prednisone                           | 7                                                            |
| <b>11</b>      | dexamethasone                        | 97                                                           |
| <b>13</b>      | prednisone                           | 87                                                           |
| <b>14</b>      | dexamethasone                        | 201                                                          |
| <b>17</b>      | dexamethasone                        | 84                                                           |
| <b>18*</b>     | prednisone                           | 0                                                            |

IDDM dx, insulin-dependent diabetes mellitus diagnosis.

**\*2 patients who received steroids within 7 prior to ICI-DM diagnosis had follow-up C-peptide levels that remained low when off steroids and continued to require exogenous insulin.**



**Table S8—Supplemental—GAD-positive versus GAD-negative**

|                                                                           | <b>All (n=18)<br/>GAD status known (n=12) +<br/>GAD status unknown (n=6)</b> | <b>GAD+ (n=5)</b>   | <b>GAD- (n=7)</b>   |
|---------------------------------------------------------------------------|------------------------------------------------------------------------------|---------------------|---------------------|
| <b>Median time to IDDM onset, months (range)</b>                          | 3.6 (0.6-12.2)                                                               | 1.4 (0.6-3.4)       | 6.0 (3.7-12.2)      |
| <b>Number of cycles of a PD-1/PD-L1 agent pre-IDDM dx, median (range)</b> | 5 (1-23)                                                                     | 3 (1-7)             | 10 (2-23)           |
| <b>Patient response to immunotherapy, n (%)<sup>§</sup></b>               |                                                                              |                     |                     |
| <b>Complete response</b>                                                  | 4 (22%)                                                                      | 1 (20%)             | 3 (43%)             |
| <b>Partial response</b>                                                   | 1 (6%)                                                                       | 0 (0%)              | 0 (0%)              |
| <b>Stable disease</b>                                                     | 2 (11%)                                                                      | 2 (40%)             | 0 (0%)              |
| <b>Progression of disease</b>                                             | 10 (56%)                                                                     | 1 (20%)             | 4 (57%)             |
| <b>Method of DM diagnosis, n (%)<sup>§</sup></b>                          |                                                                              |                     |                     |
| <b>DKA</b>                                                                | 9 (50%)                                                                      | 2 (40%)             | 4 (57%)             |
| <b>Random blood glucose</b>                                               | 9 (50%)                                                                      | 3 (60%)             | 3 (43%)             |
| <b>Initial DM median glucose, mmol/L (range)</b>                          | 27.92 (18.59-46.9)                                                           | 23.09 (18.76-43.57) | 30.36 (21.7-46.9)   |
| <b>Most recent median random glucose prior to IDDM dx, mmol/L (range)</b> | 6.35 (4.38-14.49)                                                            | 6.22 (5.44-13.82)   | 6.72 (4.38-11.88)   |
| <b>Random C-peptide closest to diagnosis, nmol/L (range)</b>              | 0.07 (<0.01-0.55)                                                            | 0.12 (<0.07-0.55)   | 0.18 (0.03-0.29)    |
| <b>Lowest random C-peptide, nmol/L (range)</b>                            | <0.01 (<0.01-0.2)                                                            | 0.01 (<0.01-0.02)   | <0.01 (<0.01-20.19) |
| <b>HbA1C at diagnosis, % (range)</b>                                      | 7.25 (5.8-9.5)                                                               | 6.7 (6.3-9.0)       | 8.3 (6.4-9.5)       |
| <b>HbA1C at diagnosis, mmol/mol (range)</b>                               | 56 (40-80)                                                                   | 50 (45-75)          | 67 (46-80)          |
| <b>Amylase close to diagnosis, n (%)<sup>§</sup></b>                      |                                                                              |                     |                     |
| <b>Elevated</b>                                                           | 3 (17%)                                                                      | 0 (0%)              | 1 (14%)             |
| <b>Normal</b>                                                             | 7 (39%)                                                                      | 3 (60%)             | 3 (43%)             |
| <b>Unknown</b>                                                            | 8 (44%)                                                                      | 2 (40%)             | 3 (43%)             |
| <b>Lipase close to diagnosis, n (%)<sup>§</sup></b>                       |                                                                              |                     |                     |
| <b>Elevated</b>                                                           | 4 (22%)                                                                      | 0 (0%)              | 1 (14%)             |
| <b>Normal</b>                                                             | 6 (33%)                                                                      | 3 (60%)             | 3 (43%)             |
| <b>Unknown</b>                                                            | 8 (44%)                                                                      | 2 (40%)             | 3 (43%)             |

GAD, glutamic acid decarboxylase; GAD+, GAD-positive; GAD-, GAD-negative; T1D, type 1 diabetes; IDDM dx, insulin-dependent diabetes mellitus diagnosis; DM, diabetes mellitus; DKA, diabetic ketoacidosis. <sup>§</sup>Percentages are all based on the n value in that specific column.

**Table S9—Supplemental—Single class versus combination immune checkpoint inhibitor therapy**

|                                                             | <b>All<br/>(n=18)</b> | <b>Single Class<br/>(n=9)</b> | <b>Combination with<br/>CTLA-4 (n=9)</b> |
|-------------------------------------------------------------|-----------------------|-------------------------------|------------------------------------------|
| <b>Median time to IDDM onset*, months (range)</b>           | 3.6 (0.6-12.2)        | 3.4 (0.75-12.2)               | 3.7 (0.6-12.0)                           |
| <b>Median OS since immunotherapy</b>                        | NR                    | NR                            | NR                                       |
| <b>Total # of cycles - median (range)</b>                   | 5 (1-23)              | 5 (3-19)                      | 5.5 (1-23)                               |
| <b>Patient response to immunotherapy, n (%)<sup>†</sup></b> |                       |                               |                                          |
| <b>Complete response</b>                                    | 4 (22%)               | 2 (22%)                       | 2 (22%)                                  |
| <b>Partial response</b>                                     | 1 (6%)                | 0 (0%)                        | 1 (11%)                                  |
| <b>Stable disease</b>                                       | 2 (11%)               | 1 (11%)                       | 1 (11%)                                  |
| <b>Progression of disease</b>                               | 10 (56%)              | 6 (67%)                       | 4 (44%)                                  |
| <b>Other adverse events, n (%)<sup>†</sup></b>              |                       |                               |                                          |
| <b>Other endocrine<sup>‡</sup></b>                          | 4 (22%)               | 2 (22%)                       | 2 (22%)                                  |
| <b>Gastrointestinal</b>                                     | 4 (22%)               | 1 (11%)                       | 3 (33%)                                  |
| <b>Liver</b>                                                | 6 (33%)               | 2 (22%)                       | 4 (44%)                                  |
| <b>Dermatologic</b>                                         | 8 (44%)               | 2 (22%)                       | 6 (67%)                                  |
| <b>Other<sup>§</sup></b>                                    | 3 (17%)               | 1 (11%)                       | 2 (22%)                                  |

CTLA-4, cytotoxic T-lymphocyte-associated antigen 4; IDDM, insulin-dependent diabetes mellitus; T1D, type 1 diabetes; OS, overall survival; NR, not reported; PD-1, programmed cell death protein 1. \*“Median time to T1D onset” is time from first dose of anti-PD-1/anti-PD-L1 therapy to DM onset in months. <sup>†</sup>Percentages for the patient response to immunotherapy and toxicities are all based on the n in that specific column. <sup>‡</sup>“Other endocrine adverse events” include one or more of the following: primary hypothyroidism, hypophysitis. <sup>§</sup>“Other” includes one or more of the following: myalgia, joint pain, pneumonitis, anemia.

**Table S10—Supplemental—Immune checkpoint inhibitor toxicities: PD-1 versus PD-L1**

|                                                              | <b>All (n=17)*</b> | <b>PD-1 (n=12)</b> | <b>PD-L1 (n=5)</b> |
|--------------------------------------------------------------|--------------------|--------------------|--------------------|
| <b>Median time to IDDM onset<sup>†</sup>, months (range)</b> | 3.7 (0.6-12.2)     | 4.8 (0.6-12.2)     | 2.5 (0.75-9.7)     |
| <b>Median OS since immunotherapy</b>                         | NR                 | NR                 | NR                 |
| <b>Total # of cycles, median (range)</b>                     | 6 (1-23)           | 8 (2-23)           | 2.5 (1-14)         |
| <b>Patient response to immunotherapy, n (%)<sup>‡</sup></b>  |                    |                    |                    |
| <b>Complete response</b>                                     | 4 (24%)            | 3 (25%)            | 1 (20%)            |
| <b>Partial response</b>                                      | 1 (6%)             | 1 (8%)             | 0 (0%)             |
| <b>Stable disease</b>                                        | 2 (12%)            | 2 (17%)            | 0 (0%)             |
| <b>Progression of disease</b>                                | 9 (59%)            | 6 (50%)            | 3 (60%)            |
| <b>Other adverse events, n (%)<sup>‡</sup></b>               |                    |                    |                    |
| <b>Other endocrine<sup>§</sup></b>                           | 4 (24%)            | 3 (25%)            | 1 (20%)            |
| <b>Gastrointestinal</b>                                      | 3 (17%)            | 3 (25%)            | 0 (0%)             |
| <b>Liver</b>                                                 | 6 (35%)            | 5 (42%)            | 1 (20%)            |
| <b>Dermatologic</b>                                          | 7 (41%)            | 6 (50%)            | 1 (20%)            |
| <b>Other<sup>  </sup></b>                                    | 2 (12%)            | 1 (8%)             | 1 (20%)            |

IDDM, insulin-dependent diabetes mellitus; PD-1, programmed cell death protein 1; PD-L1, programmed cell death protein ligand 1, T1D, type 1 diabetes; OS, overall survival; NR, not reported. \*For the table above, one patient was classified as PD-1 + PD-L1. This patient was not included in the table. <sup>†</sup>“Median time to T1D onset” is time from first dose of anti-PD–1/anti-PD-L1 therapy to T1D onset in months. <sup>‡</sup>Percentages for the patient response to immunotherapy and adverse events are all based on the n in that specific column. <sup>§</sup>“Other endocrine adverse events” include one or more of the following: primary hypothyroidism, hypophysitis. <sup>||</sup>“Other” includes one or more of the following: myalgia, joint pain, pneumonitis, anemia.

**Figure S1—Supplemental—Random C-peptide trend.** Patients who had 2 or more random C-peptide levels measured are included on this graph. Patients with random C-peptide levels measured only at the time of initial disease onset were excluded.

IDDM, insulin-dependent diabetes mellitus.

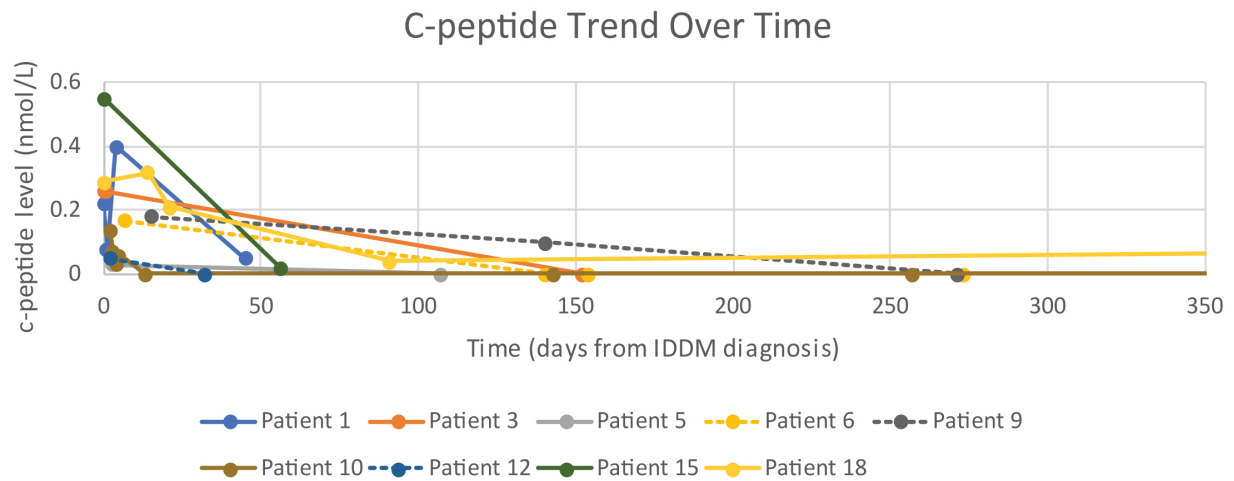

**Figure S2—Supplemental—HbA1C trend.** Patients who had 2 or more measured HbA1C levels are included on this graph.

IDDM, insulin-dependent diabetes mellitus.

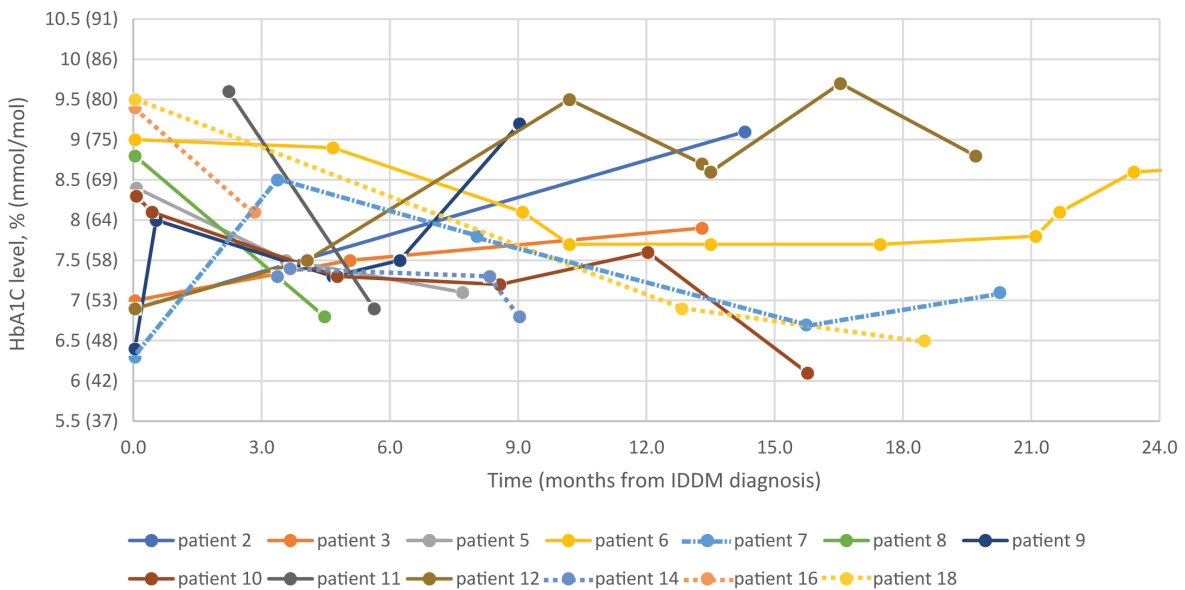

**Figure S3—Supplemental**—Toxicity box plot demonstrating the time course of various toxicities after treatment with ICI. Toxicity onset after ICI therapy (either anti-PD-1 or anti-PD-L1 alone, or in combination with anti-CTLA-4 therapy). Dermatologic AEs tend to occur early on in treatment; ICI-DM onset was variable after ICI treatment. Four patients (22%) experienced other endocrine AEs attributed to immunotherapy, including secondary adrenal insufficiency from hypophysitis (n=1) and primary hypothyroidism (n=3). Other ICI-related AEs included gastrointestinal tract toxicity (n=4; 22%), hepatotoxicity (n=6; 33%), and dermatologic toxicity (n=8; 44%). Other AEs included anemia, myalgia, fatigue, joint pain, and pneumonitis.

ICI, immune checkpoint inhibitor; AE, adverse event; PD-1, programmed cell death protein 1; PD-L1, programmed cell death protein ligand 1; CTLA-4, cytotoxic T-lymphocyte-associated antigen 4; ICI-DM, ICI-associated insulin-dependent diabetes mellitus; Derm, dermatologic; IDDM, insulin-dependent diabetes mellitus; Endo, endocrine; GI, gastrointestinal

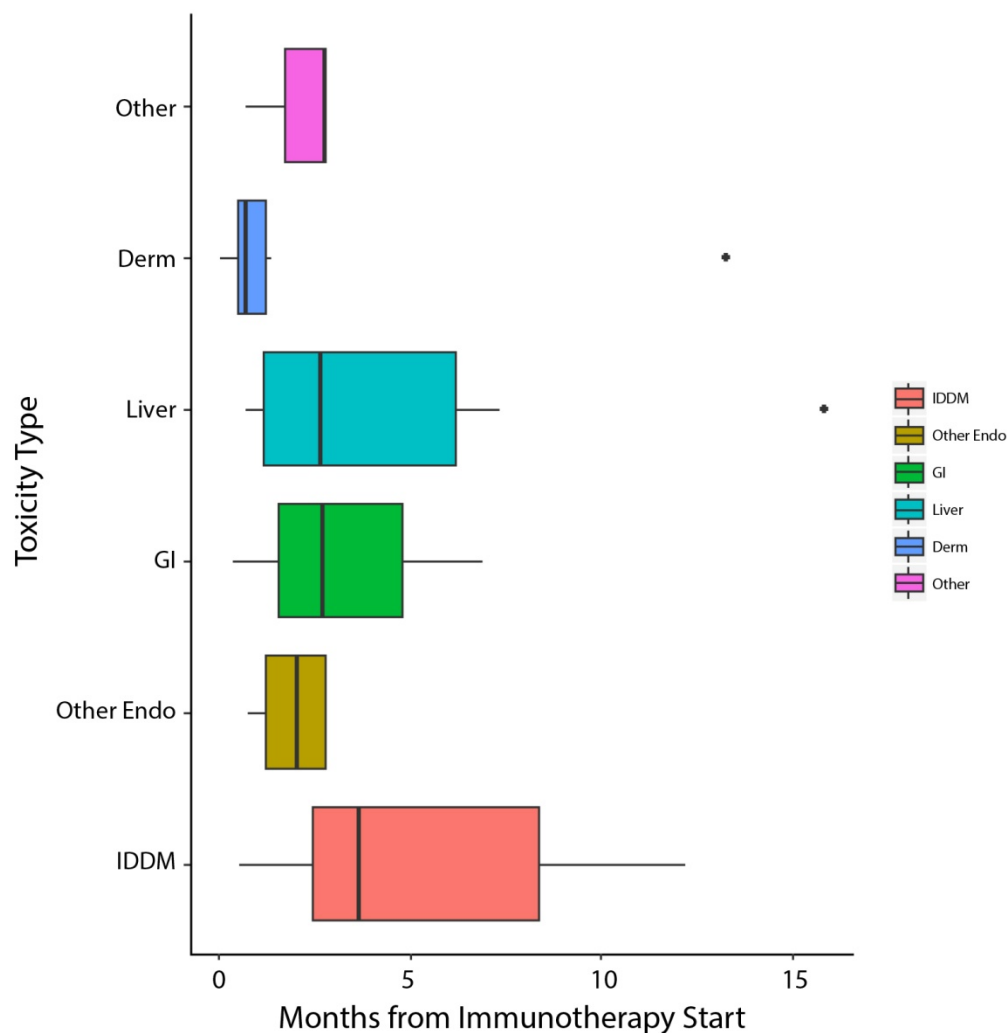

Supplement: Supplementary file 1 [file 25040069]
